# Supplementary material
Source: PubMed Central journal article supplement (PMC5555225)
Supplement: NIHMS893950-supplement-supplement_1.pdf [file NIHMS893950-supplement-supplement_1.pdf]

## Supplementary Materials for

### **Differential abundance of CK1 $\alpha$ provides selectivity for pharmacological CK1 $\alpha$ activators to target WNT-dependent tumors**

Bin Li, Darren Orton, Leif R. Neitzel, Luisana Astudillo, Chen Shen, Jun Long, Xi Chen, Kellye C. Kirkbride, Thomas Doundoulakis, Marcy L. Guerra, Julia Zaias, Dennis Liang Fei, Jezabel Rodriguez-Blanco, Curtis Thorne, Zhiqiang Wang, Ke Jin, Dao M. Nguyen, Laurence R. Sands, Floriano Marchetti, Maria T. Abreu, Melanie H. Cobb, Anthony J. Capobianco, Ethan Lee, David J. Robbins\*

\*Corresponding author. Email: drobbins@med.miami.edu

Published 27 June 2017, *Sci. Signal.* **10**, eaak9916 (2017)  
DOI: 10.1126/scisignal.aak9916

#### **This PDF file includes:**

- Fig. S1. SSTC3 inhibits WNT signaling via CK1 $\alpha$ .
- Fig. S2. SSTC3 attenuates the viability of cells dependent on WNT activity.
- Fig. S3. A structural analog of SSTC3, SSTC111, does not inhibit WNT biomarkers in CRC cells.
- Fig. S4. SSTC3 treatment decreases tumor cell density in CRC xenografts.
- Fig. S5. SSTC3 has limited on-target GI toxicity in mice.
- Fig. S6. Decreased abundance of CK1 $\alpha$  sensitizes cells to SSTC3.

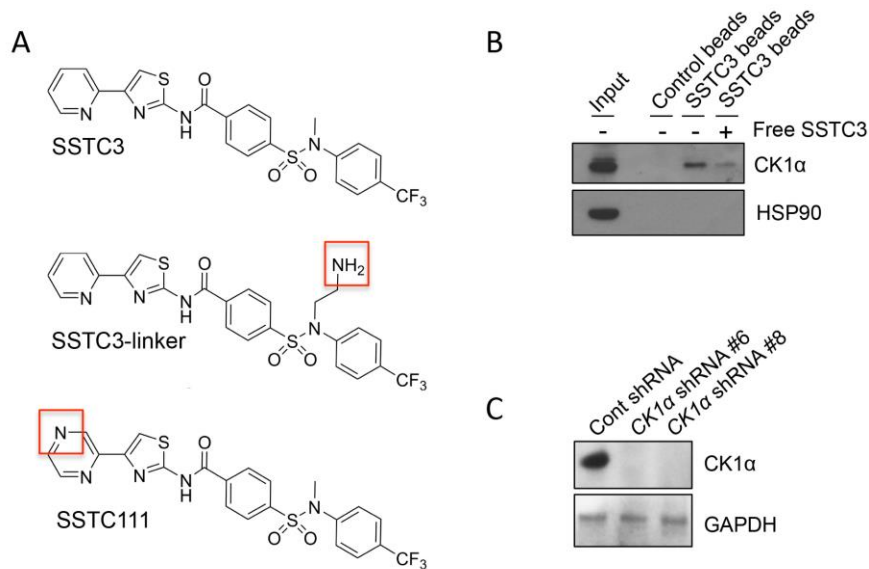

**Fig. S1. SSTC3 inhibits WNT signaling via CK1 $\alpha$ .** (A) Structural formula of SSTC3, its derivative with a free amine (SSTC3 linker) and an inactive analog (SSTC111). (B) SSTC3 binds to CK1 $\alpha$  in a competitive manner. SSTC3 coupled agarose beads were used to isolate endogenous CK1 $\alpha$  from 293T cell lysates in the presence or absence of free SSTC3, followed by analysis of the indicated proteins by immunoblotting. (C) CK1 $\alpha$  abundance was determined in HCT116 cells expressing control or CK1 $\alpha$  specific shRNA by immunoblotting. Data are representative of 3 experiments.

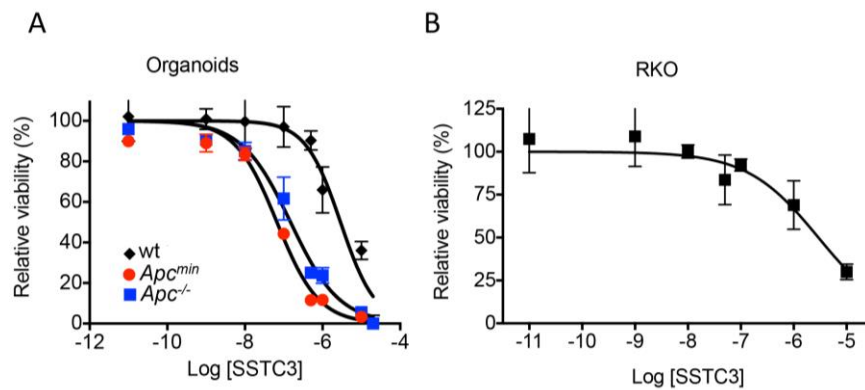

**Fig. S2. SSTC3 attenuates the viability of cells dependent on WNT activity.** (A) *Apc* mutant organoids are more sensitive to SSTC3 than wild-type (wt) intestinal organoids. The indicated organoids, derived from wt mouse intestines or *Apc* mutant tumors, were treated with the indicated doses of SSTC3 for 4 days and cell viability determined (n= 4 separate cultures). (B) The ability of SSTC3 to reduce the viability of non-WNT dependent CRC cells is significantly reduced. RKO cells were treated with the indicated concentrations of SSTC3 for 5 days and viability determined (n= 3 experiments).

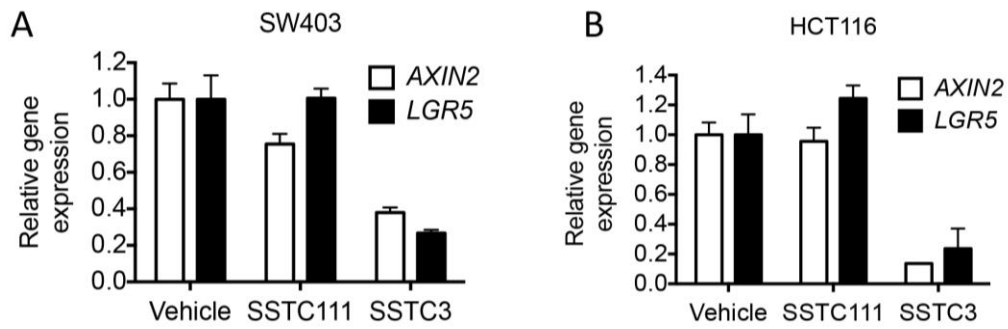

**Fig. S3. A structural analog of SSTC3, SSTC111, does not inhibit WNT biomarkers in CRC cells. (A and B)** Quantification of *AXIN2* or *LGR5* expression, determined by qRT-PCR, in SW403 (A) or HCT116 (B) cells treated with 2  $\mu$ M of SSTC3 or SSTC111 for 48 hours. Representative data (mean  $\pm$  S.D.) from at least two independent experiments are shown.

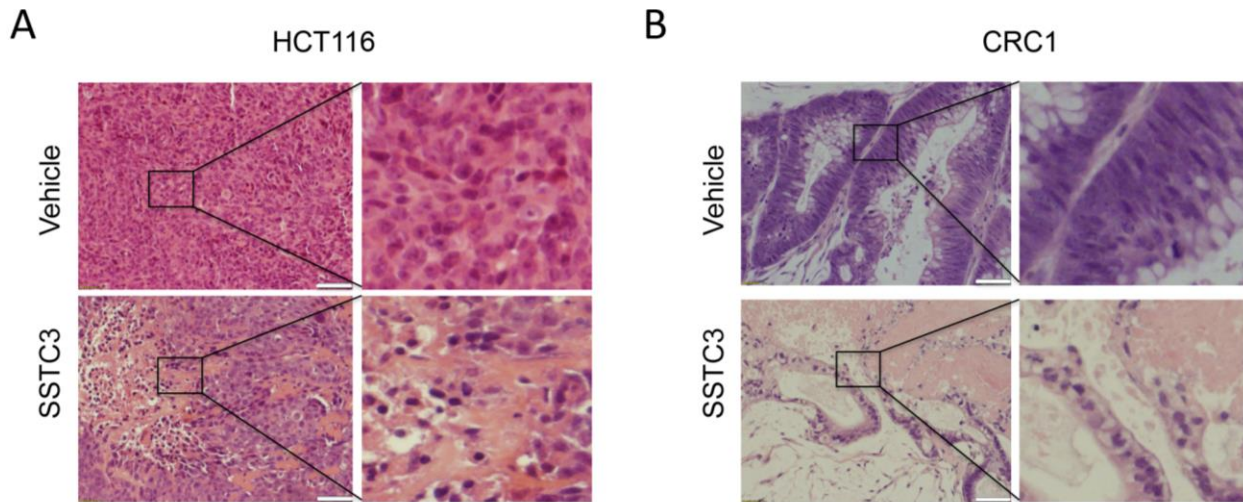

**Fig. S4. SSTC3 treatment decreases tumor cell density in CRC xenografts. (A and B)** Higher resolution H&E staining images for Fig. 4B and Fig. 4F, respectively.

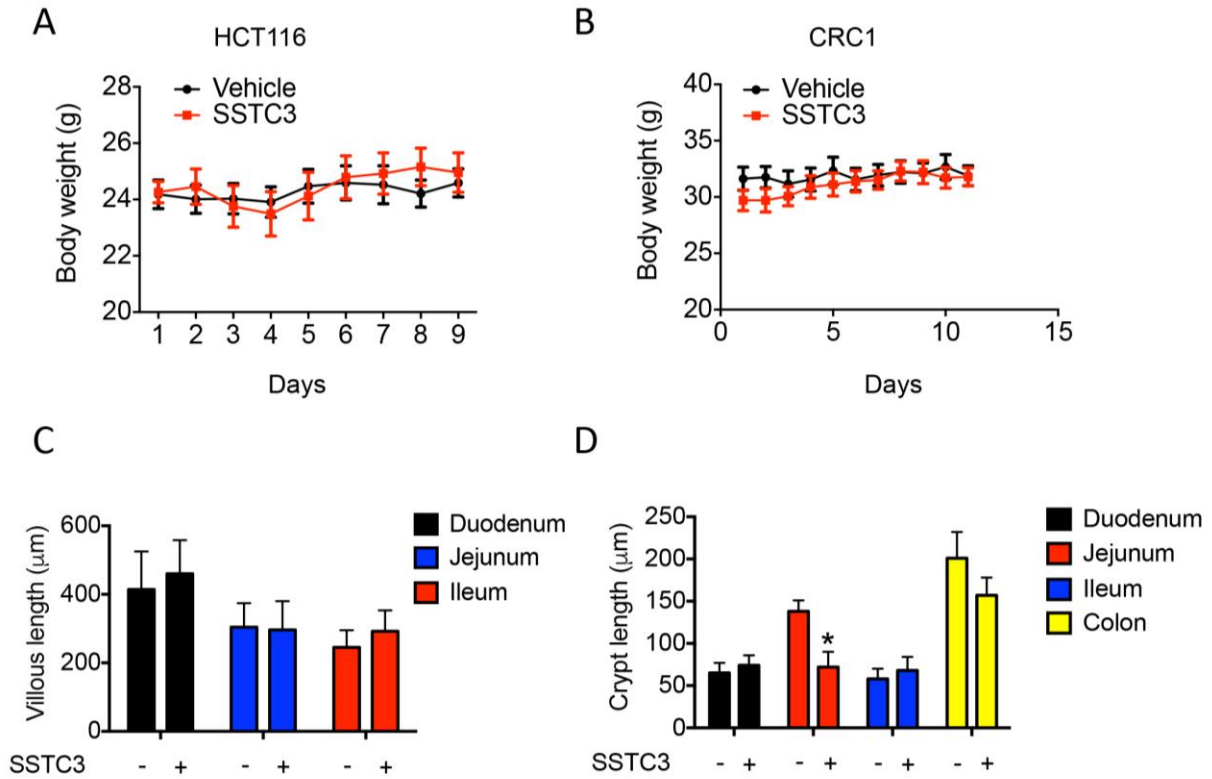

**Fig. S5. SSTC3 has limited on-target GI toxicity in mice. (A and B)** Body weight data for experiments in Fig. 4B and Fig. 4F respectively. **(C and D)** The intestines of the indicated drug treated mice (n= 4 in each group) were harvested, fixed and subjected to analysis for villous (C) and crypt (D) length. n= 10 random fields; \*  $p \leq 0.05$ .

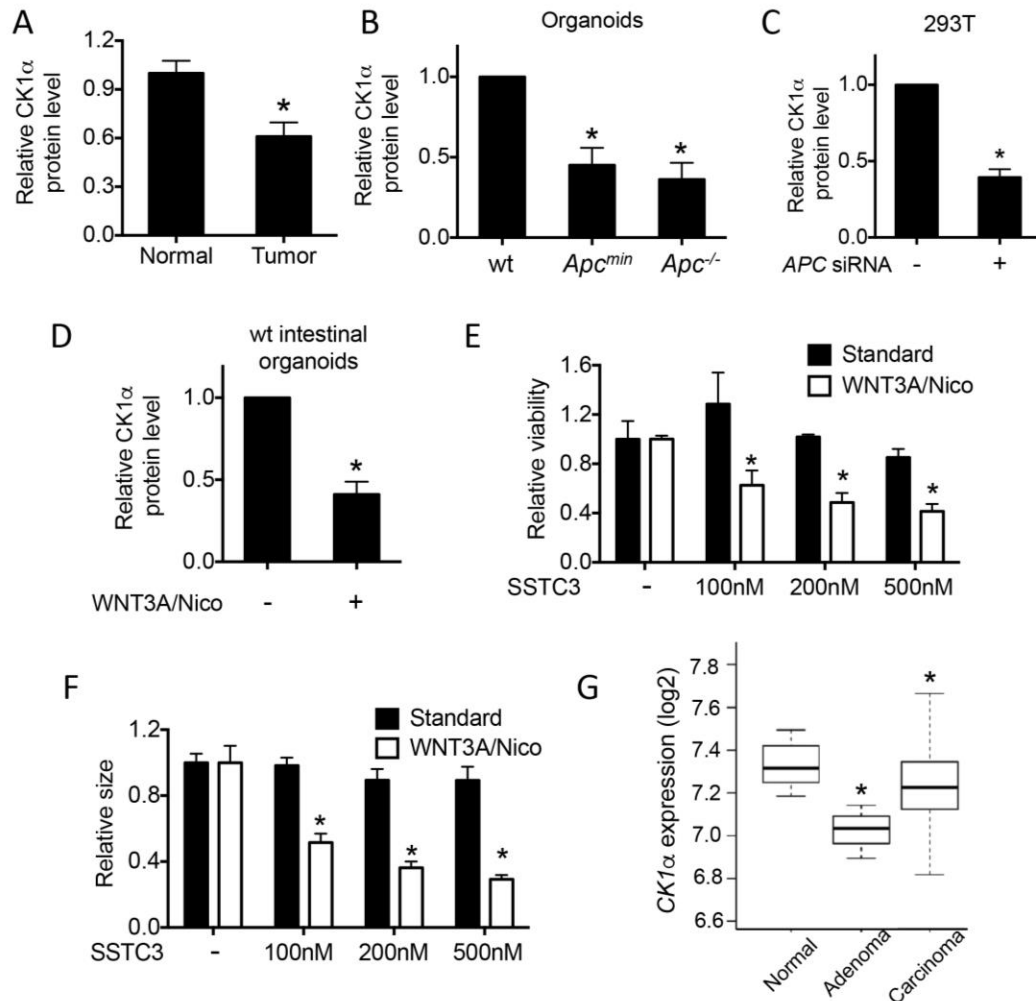

**Fig. S6. Decreased abundance of CK1 $\alpha$  sensitizes cells to SSTC3.** (A and B) *Apc* mutant tumors have decreased amounts of CK1 $\alpha$ . Quantitative data for Fig. 6A (n= 3 in normal and 4 in tumor) and Fig 6B (n= 3) are shown. (C) Loss of *APC* results in decreased levels of CK1 $\alpha$ . Quantification from three independent experiments represented in Fig. 6C is shown. (D) Hyperactivated WNT activity decreases CK1 $\alpha$  abundance in wild-type (wt) intestinal organoids. Organoids were treated with regular niche factors, or supplemented with WNT3A and 1 mM nicotinamide (Nico) for a week to activate WNT signaling. CK1 $\alpha$  abundance was determined by immunoblotting and quantitated (represented in Fig. 6D; n= 3). (E and F) WNT hyperactivated intestinal organoids are sensitized to SSTC3. Size of intestinal organoids grown in the indicated medium and treated with increasing amounts of SSTC3 for 4 days (E; n= 4 independent replicates) or viability (F; n= 3 independent replicates). (G) CK1 $\alpha$  expression is decreased in CRC samples. Gene expression data were downloaded from the Gene Expression Omnibus (GSE17538) and normalized using a Robust Multi-array Average (RMA). Shown is a box and whisker plot of log<sub>2</sub> transformed CK1 $\alpha$  expression values for normal colon tissue (n= 10), adenomas (n= 6) or carcinomas (n= 250). \* p $\leq$  0.05, Wilcox rank sum test.
